# Supplementary material
Source: Springer Nature journal article supplement (https://www.springermedizin.de/resource/supplementary/12968_2010_1443_MOESM2_ESM.pdf/9580146)

a) recorded pressure pulse wave

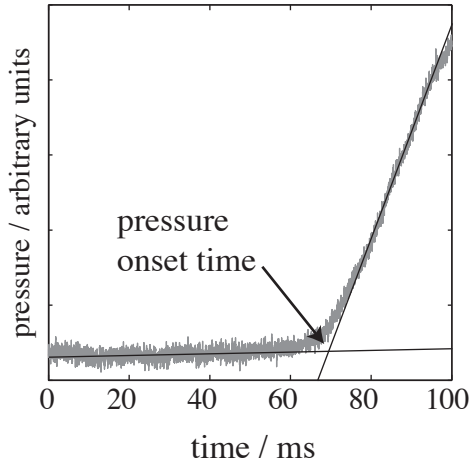

b) catheter position vs. pressure onset time

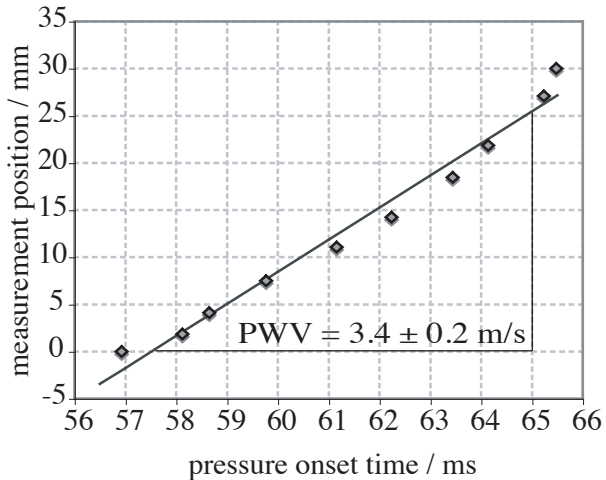

Supplement: MOESM2 [file 9580146]
